# Supplementary material
Source: Frontiers journal article supplement (https://www.frontiersin.org/articles/65539)
Supplement: Presentation_1.PDF [file Presentation_1.PDF]

**Supplementary information:**

**Microbial diversity and methanogenic activity of Antrim Shale  
formation waters from recently fractured wells.**

Cornelia Wuchter<sup>1\*</sup>, Erin Banning<sup>1◇</sup>, Tracy Mincer<sup>1</sup>, Nicholas J. Drenzek<sup>2†</sup> and Marco J.L. Coolen<sup>1</sup>

<sup>1</sup>Woods Hole Oceanographic Institution, Marine Chemistry and Geochemistry Department, Woods Hole, MA 02543, USA. <sup>2</sup>Schlumberger Doll Research, Reservoir Geosciences Department, Cambridge, MA 02139, USA. <sup>†</sup>Now at Statoil Research Center, Unconventional Shale Oil and Gas Sector, 5020-Bergen, Norway. <sup>◇</sup>Now at Algenol Biofuels Inc., Bonita Springs, FL 34135, USA

**Materials and methods**

**Bacterial and archaeal taxonomy based on capillary sequenced DGGE bands.**

DNA from the initial well water and incubation experiments were extracted according to (Wuchter, *et al.*, 2004). Partial bacterial and archaeal 16S rDNA genes were amplified by polymerase chain reaction (PCR) using a Realplex quantitative PCR system (Eppendorf, Hauppauge, NY) and reagents (with the exception of primers) as described previously (Coolen, *et al.*, 2009). Bacterial 16S rDNA (V4-region) was amplified with the general primers Bac341f (Muyzer, *et al.*, 1993) and Bac806r (Takai & Horikoshi, 2000). Archaeal 16S rDNA was first amplified with the archaea-specific primers Arch 21F (DeLong, 1992) and Arch915r (Stahl & Amann, 1991), followed by a nested PCR with the universal primer 519f (complementary

reverse sequence of Parch 519r (Ovreas, *et al.*, 1997)) and the archaeal primer Arch915r (i.e., V4-region) to increase specificity. We used the SYBR<sup>®</sup>Green-based qPCR protocol after Coolen *et al.*, (2009) except for the primer annealing step, which was set to 61 °C and 40 sec for both the bacterial and archaeal primer combinations. The reactions were terminated in the exponential phase (i.e., after 23 to 30 cycles) to minimize the formation of PCR artifacts. About 10<sup>7</sup> gene copies served as template for a second round of PCR (only 10 cycles) using the same conditions except that the 5' end of one of the primers in each pair (Bac341f or Arch915r) included a 40-basepair long GC clamp for subsequent denaturing gradient gel electrophoresis (DGGE) (Muyzer, *et al.*, 1993) The use of the long GC clamp primers in the initial round of PCR was avoided to prevent the formation of primer dimers.

PCR-amplified bacterial and archaeal 16S rDNA products were separated by DGGE. The polyacrylamide gels (6%, wt/vol) contained a linear denaturing gradient of 20 to 70% (with 100% denaturant equaling 7 M urea and 40% formamide) for bacterial and 30 to 60% for archaeal 16S rDNA. Gels were run for 15 hours at 5 V.cm<sup>-1</sup> and 60 °C using a PhorU2 system (Ingeny, Leiden, Netherlands). Afterwards, the gels were stained with SYBR<sup>®</sup>Gold (Invitrogen) and a Dark Imager (Clare Chemicals Research Inc., Dolores, CO) was used to visualize the SYBR<sup>®</sup>Gold-stained DNA (Coolen, *et al.*, 2009). Digital gel images were made using the Foto/Analyst<sup>®</sup> Express System (Fotodyne, Hartland, WI) and ImageJ software. TotalLab TL100 v2006 1D-gel analysis software (Nonlinear Dynamics, Durham, NC) was used to identify the exact vertical position of each band in order to characterize unique vs. identical bands between samples. Representative DGGE bands were then sliced from the gel with a sterile scalpel and the DNA of each gel fragment was eluted in 10 mM Tris-HCl at pH 8.0 by incubation for 24 hours at 2 °C.

Approximately  $10^7$  copies of the gel-eluted 16S rDNAs were re-amplified using 18 cycles and the primer combinations listed above without the GC-clamp. These amplicons served as template for subsequent capillary sequencing reactions using the Beckman Coulter Genomics facilities (Beverly, MA). In total, 284 bacterial DGGE fragments and 225 archaeal DGGE fragments were sequenced. Bacterial forward and reverse reactions were aligned and sequencing errors removed using the Sequencher 10.7 software package. All sequences were trimmed at the same length (348 bp) using the CLC Main Workbench 6.0 software package (CLC bio, Cambridge, MA). Chimera check and identification of operational taxonomic units (OTUs) based on 97% sequence identity was performed using mothur version 1.26.0 (Schloss, *et al.*, 2009). Closely related sequences of the unique recovered bacterial OTUs were identified through a BLAST search (Altschul, *et al.*, 1990) against the NCBI-nr database.

All sequence reads obtained from DGGE fragments amplified by archaeal-specific PCR primers were manually trimmed in BioEdit v7.1.3 to the sequencing primers and merged in order to maximize the amount of sequence available for phylogenetic analysis. Low-quality sequences, as judged by the observation of large numbers of ambiguous base-calls or incoherent chromatogram peaks, were excluded from further analysis. The resulting full-length DGGE fragment sequences were imported into ARB v5.1 (Ludwig, *et al.*, 2004) using a modified version of the Silva SSU Reference database release 108 (Pruesse, *et al.*, 2007). Sequences were aligned and added by parsimony analysis to a neighbor-joining tree of full-length, high-quality archaeal 16S rRNA sequences from major euryarchaeal groups to identify clusters of phylogenetically similar sequences. Each cluster's alignment was manually curated with its most closely related sequences and the sequences exported through a mask based on the resulting alignment to mothur. The sequences were divided into clusters based on class within the

euryarchaea, and OTU analysis undertaken of each cluster separately, to maximize the number of alignable positions available. Three clusters were identified and analyzed separately for OTUs, affiliated with the Methanomicrobia, the uncultured Deep Sea Hydrothermal Vent Group (DSHVG) and other uncultured groups (including the South African Gold Mine Euryarchaeal Group). OTU analyses were conducted with cutoffs between 90 and 100% similarity, and cutoffs chosen for each group in comparison with their clustering on the tree (96% similarity cutoff for Methanomicrobia OTUs, 98% for those affiliated with the DSHVG and 96% for the other uncultured groups). Representative sequences of each archaeal OTU were added by parsimony analysis to a maximum-likelihood tree of all major euryarchaeal clades built from full-length, well-aligned sequences from the Silva reference database. Bacterial and archaeal sequences obtained from this study have been submitted to GenBank database under accession numbers KC262274-KC262335.

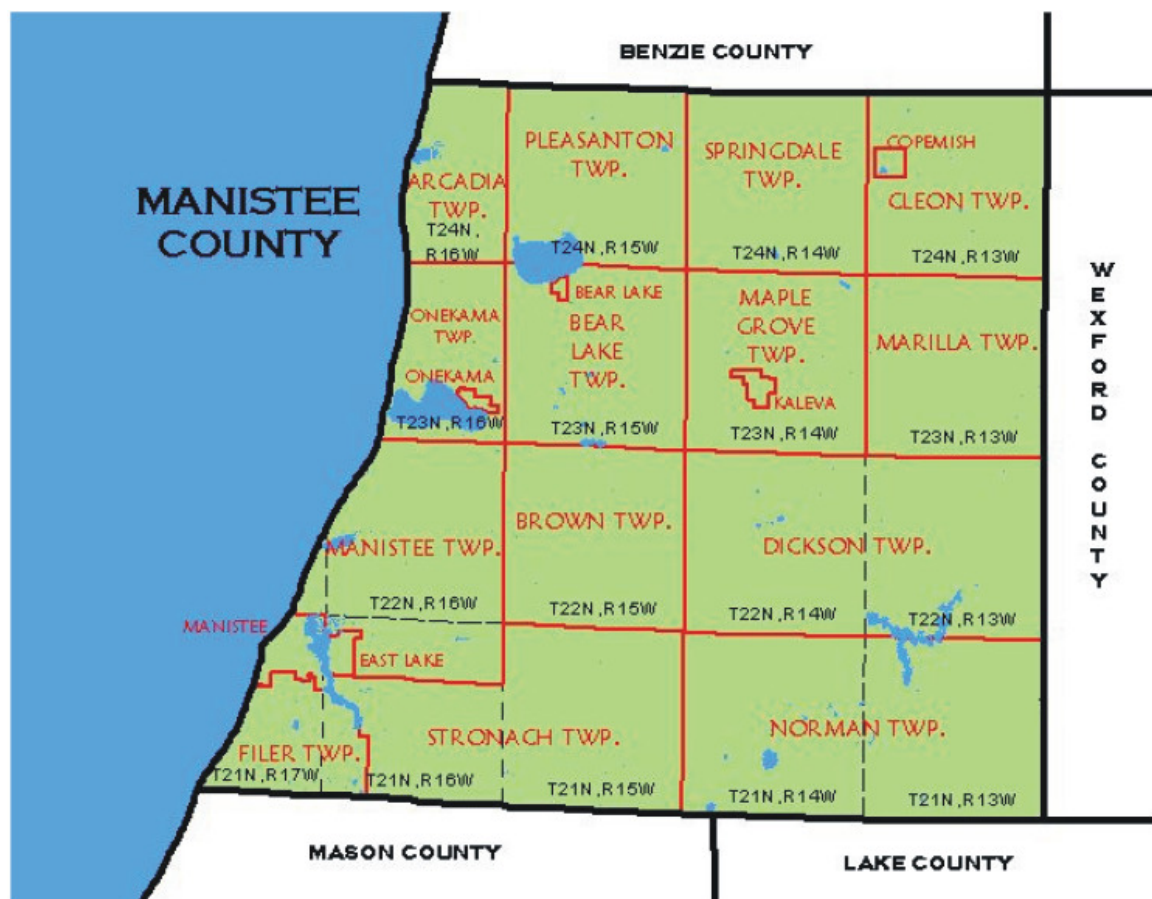

[http://www.midnr.com/Publications/pdfs/ForestsLandWater/Commercial\\_Forest/Manistee.jpg](http://www.midnr.com/Publications/pdfs/ForestsLandWater/Commercial_Forest/Manistee.jpg)

**Supplementary Fig. S1:** The three investigated wells are located in the Manistee County in the Township of Pleasanton. The wells are located in zone 11 and 12 in Pleasanton Township (well A3-11: 11-T24N-R15, well B1-12: 12-T24N-R15 and well C1-12: 12-T24N-R15). For more detailed information about a zoning map of Pleasanton see: [http://www.pleasantontownship.org/zoning\\_files/zoningmap.gif](http://www.pleasantontownship.org/zoning_files/zoningmap.gif).

**Supplementary Table S1:** Detailed information of the well water chemistry. Multiple fractured A3-11 well was previously analyzed in 2009 and data were kindly provided by Presidium Energy. Well water analyses for 2011 were performed for this study by ACT lab.

| water sampled<br>mg/l | Presidium<br>6/29/2009<br>A3-11 | ACT lab<br>7/22/2011<br>A3-11 | ACT lab<br>7/22/2011<br>B1-12 | ACT lab<br>5/27/2011<br>C1-12 |
|-----------------------|---------------------------------|-------------------------------|-------------------------------|-------------------------------|
| Cations:              |                                 |                               |                               |                               |
| Calcium               | 3700                            | 3890                          | 3160                          | 3560                          |
| Magnesium             | 2300                            | 2250                          | 1920                          | 2130                          |
| Sodium                | 26700                           | 28900                         | 25900                         | 29700                         |
| Iron                  | 51                              | 43.2                          | 44.1                          | 57                            |
| Potassium             | 233                             | 254                           | 224                           | 232                           |
| Barium                | 24.8                            | 30.4                          | 24.8                          | 28                            |
| Strontium             | 160                             | 171                           | 150                           | 172                           |
| Manganese             | 0.37                            | 0.52                          | 0.20                          | 0.24                          |
| Anions:               |                                 |                               |                               |                               |
| Bicarbonate           | 854                             | 530                           | 625                           | 650                           |
| Sulfate               | n.d                             | n.d                           | n.d                           | n.d                           |
| Chloride              | 63600                           | 60900                         | 53700                         | 61200                         |

**Supplementary Table S2:** Detailed gas composition of the C1-12 well was kindly provided by Presidium Energy. A3-11 and B1-12 well were not analyzed for gas composition by the company.

|                |        |
|----------------|--------|
|                | mol%   |
| Gases:         |        |
| Carbon Dioxide | 3.97   |
| nitrogen       | 2.916  |
| methane        | 92.195 |
| ethane         | 0.792  |
| propane        | 0.073  |
| iso-butane     | 0.052  |
| hexane         | 0.001  |
| hexane plus    | 0.001  |

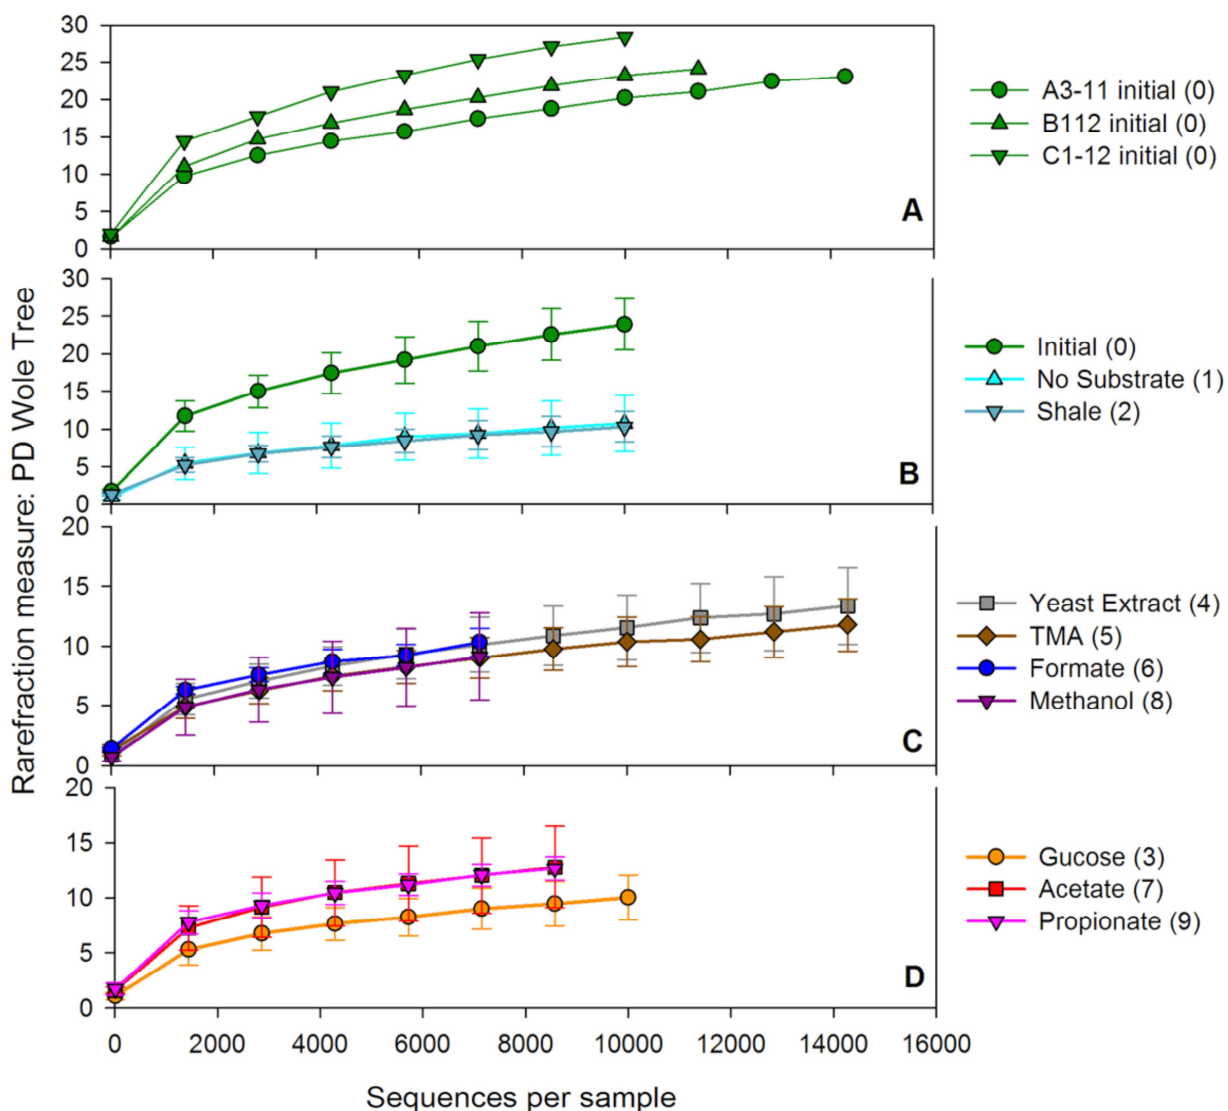

### Supplementary Fig. S2

Comparison of rarefaction  $\alpha$  diversity measures in the initial well waters and upon completion of the various substrate incubation experiments including the no-substrate control using the Phylogenetic Diversity metric. Grouping of treatments is based on (A) initial well waters (B) Natural or no substrates (C) substrates that resulted in methane production (D) substrates that did not yield methane.

|               | Treatment     | Seqs/Sample | PD Ave. | PD Err. | chao1 Ave. | chao1 Err. | obs. Spec. Ave. | obs. Spec. Err. |            | Treatment | Seqs/Sample | PD Ave. | PD Err. | chao1 Ave. | chao1 Err. | obs. Spec. Ave. | obs. Spec. Err. |        |
|---------------|---------------|-------------|---------|---------|------------|------------|-----------------|-----------------|------------|-----------|-------------|---------|---------|------------|------------|-----------------|-----------------|--------|
| 0             | Initial       | 10          | 1.757   | 0.213   | 9.133      | 2.331      | 5.233           | 0.772           | 5          | TMA       | 10          | 1.313   | 0.458   | 4.917      | 3.317      | 3.65            | 2.05            |        |
|               | Initial       | 1437        | 11.726  | 1.993   | 220.458    | 39.248     | 84.733          | 14.474          |            | TMA       | 1437        | 4.912   | 0.988   | 104.871    | 50.382     | 46.55           | 18.95           |        |
|               | Initial       | 2864        | 14.989  | 2.143   | 329.281    | 46.159     | 130.167         | 22.431          |            | TMA       | 2864        | 6.251   | 1.106   | 184.69     | 67.791     | 72.3            | 27.4            |        |
|               | Initial       | 4291        | 17.427  | 2.709   | 377.636    | 65.91      | 164.267         | 27.897          |            | TMA       | 4291        | 7.477   | 1.234   | 208.523    | 71.463     | 93.5            | 34.6            |        |
|               | Initial       | 5718        | 19.189  | 3.086   | 416.517    | 54.082     | 193.133         | 33.98           |            | TMA       | 5718        | 8.266   | 1.38    | 255.776    | 91.699     | 108.9           | 42.1            |        |
|               | Initial       | 7145        | 21.003  | 3.27    | 451.916    | 72.936     | 221.3           | 38.618          |            | TMA       | 7145        | 9.019   | 1.703   | 243.579    | 85.871     | 124.75          | 47.15           |        |
|               | Initial       | 8572        | 22.542  | 3.414   | 508.594    | 60.058     | 247.567         | 41.488          |            | TMA       | 8572        | 9.749   | 1.764   | 275.461    | 105.633    | 137.35          | 52.15           |        |
|               | Initial       | 9999        | 23.897  | 3.372   | 563.688    | 40.041     | 271.567         | 42.962          |            | TMA       | 9999        | 10.354  | 2.058   | 297.704    | 115.056    | 151.25          | 56.05           |        |
| 1             | No Substrate  | 10          | 0.968   | 0.422   | 5.1        | 3.645      | 3.167           | 1.372           | 6          | TMA       | 11426       | 10.575  | 1.862   | 314.638    | 107.858    | 163.95          | 59.45           |        |
|               | No Substrate  | 1437        | 5.47    | 2.127   | 112.941    | 33.97      | 42.867          | 11.493          |            | TMA       | 12853       | 11.162  | 2.117   | 345.699    | 148.502    | 175.1           | 65.5            |        |
|               | No Substrate  | 2864        | 6.828   | 2.728   | 161.493    | 59.006     | 65.8            | 17.759          |            | TMA       | 14280       | 11.773  | 2.184   | 325.967    | 132.227    | 185.75          | 68.25           |        |
|               | No Substrate  | 4291        | 7.82    | 2.942   | 204.445    | 53.311     | 83.033          | 22.09           |            | 6         | Formate     | 10      | 1.437   | 0.124      | 4.25       | 0.442           | 3.333           | 0.419  |
|               | No Substrate  | 5718        | 8.986   | 3.055   | 261.285    | 86.889     | 101.167         | 25.601          |            |           | Formate     | 1437    | 6.293   | 0.299      | 100.837    | 15.98           | 43.7            | 3.78   |
|               | No Substrate  | 7145        | 9.404   | 3.257   | 263.178    | 81.236     | 112.133         | 28.74           |            |           | Formate     | 2864    | 7.594   | 0.593      | 140.171    | 9.354           | 63.1            | 4.704  |
|               | No Substrate  | 8572        | 10.145  | 3.589   | 280.728    | 103.957    | 125.033         | 34.065          |            |           | Formate     | 4291    | 8.706   | 1.017      | 194.492    | 43.249          | 79.4            | 9.504  |
|               | No Substrate  | 9999        | 10.763  | 3.707   | 293.635    | 102.989    | 138.033         | 37.105          |            |           | Formate     | 5718    | 9.239   | 0.897      | 194.847    | 31.88           | 91.8            | 9.476  |
| 2             | Shale         | 10          | 1.3     | 0.156   | 3.733      | 0.484      | 3.133           | 0.33            | 7          | Formate   | 7145        | 10.322  | 1.159   | 238.567    | 50.121     | 105.967         | 11.625          |        |
|               | Shale         | 1437        | 5.231   | 0.965   | 95.954     | 44.029     | 37.433          | 9.468           |            | 7         | Acetate     | 10      | 1.595   | 0.292      | 7.35       | 2.48            | 4.567           | 1.239  |
|               | Shale         | 2864        | 6.721   | 1.106   | 145.272    | 48.495     | 56.4            | 12.942          |            |           | Acetate     | 1437    | 7.253   | 2.029      | 132.608    | 53.177          | 53.133          | 15.598 |
|               | Shale         | 4291        | 7.646   | 1.454   | 160.783    | 58.607     | 71.133          | 17.466          |            |           | Acetate     | 2864    | 9.129   | 2.713      | 193.125    | 74.803          | 80.867          | 25.217 |
|               | Shale         | 5718        | 8.428   | 1.529   | 184.978    | 62.456     | 83.867          | 20.956          |            |           | Acetate     | 4291    | 10.453  | 3.033      | 229.247    | 76.325          | 101.467         | 31.628 |
|               | Shale         | 7145        | 9.219   | 1.896   | 221.259    | 79.966     | 97.533          | 28.152          |            |           | Acetate     | 5718    | 11.27   | 3.423      | 253.907    | 73.332          | 120.4           | 39.538 |
|               | Shale         | 8572        | 9.658   | 1.993   | 241.998    | 94.606     | 107.533         | 32.008          |            |           | Acetate     | 7145    | 12.023  | 3.419      | 308.948    | 86.918          | 134.8           | 43.093 |
|               | Shale         | 9999        | 10.298  | 1.993   | 263.654    | 91.972     | 118.933         | 33.595          |            |           | Acetate     | 8572    | 12.786  | 3.69       | 344.976    | 102.923         | 150.367         | 48.853 |
| 3             | Glucose       | 10          | 1.088   | 0.331   | 3.139      | 1.446      | 2.767           | 0.998           | 8          |           | Methanol    | 10      | 0.749   | 0.38       | 3.183      | 1.532           | 2.333           | 0.685  |
|               | Glucose       | 1437        | 5.296   | 1.4     | 82.775     | 26.924     | 34.833          | 11.238          |            | Methanol  | 1437        | 4.864   | 2.334   | 104.011    | 38.101     | 45.067          | 15.99           |        |
|               | Glucose       | 2864        | 6.759   | 1.498   | 139.338    | 29.399     | 53.3            | 15.423          |            | Methanol  | 2864        | 6.336   | 2.721   | 140.757    | 24.73      | 65.133          | 24.08           |        |
|               | Glucose       | 4291        | 7.622   | 1.469   | 176.719    | 47.704     | 67.233          | 19.566          |            | Methanol  | 4291        | 7.384   | 3.026   | 183.258    | 42.469     | 82.767          | 28.84           |        |
|               | Glucose       | 5718        | 8.224   | 1.706   | 185.939    | 42.022     | 79.633          | 21.273          |            | Methanol  | 5718        | 8.206   | 3.237   | 224.758    | 85.566     | 97.133          | 32.457          |        |
|               | Glucose       | 7145        | 8.988   | 1.862   | 211.594    | 70.179     | 89.767          | 25.485          |            | Methanol  | 7145        | 9.109   | 3.625   | 246.05     | 109.04     | 110.6           | 36.944          |        |
|               | Glucose       | 8572        | 9.448   | 2.019   | 223.835    | 62.795     | 99.333          | 28.686          |            | 9         | Propionate  | 10      | 1.735   | 0.544      | 9.325      | 4.625           | 4.95            | 1.95   |
|               | Glucose       | 9999        | 10.014  | 2.033   | 243.836    | 48.884     | 108.867         | 29.604          |            |           | Propionate  | 1437    | 7.752   | 1.061      | 142.601    | 18.939          | 59.4            | 12.5   |
| 4             | Yeast Extract | 10          | 0.928   | 0.539   | 3.383      | 0.968      | 2.567           | 0.464           | Propionate |           | 2864        | 9.284   | 1.128   | 196.292    | 22.527     | 86.95           | 16.65           |        |
|               | Yeast Extract | 1437        | 5.522   | 1.309   | 127.231    | 18.056     | 51.533          | 8.328           | Propionate |           | 4291        | 10.422  | 1.045   | 261.299    | 25.025     | 112.4           | 17.7            |        |
|               | Yeast Extract | 2864        | 7.041   | 1.434   | 164.595    | 5.739      | 78.067          | 12.597          | Propionate |           | 5718        | 11.16   | 0.992   | 289.656    | 20.569     | 130.4           | 19.1            |        |
|               | Yeast Extract | 4291        | 8.338   | 1.615   | 191.128    | 18.457     | 98.933          | 11.726          | Propionate |           | 7145        | 12.063  | 1.039   | 338.871    | 23.439     | 148.2           | 22              |        |
|               | Yeast Extract | 5718        | 9.322   | 2.07    | 228.007    | 20.871     | 113.8           | 13.425          | Propionate |           | 8572        | 12.665  | 1.07    | 380.485    | 21.779     | 166.85          | 21.05           |        |
|               | Yeast Extract | 7145        | 10.115  | 2.27    | 240.224    | 24.024     | 128.033         | 12.283          |            |           |             |         |         |            |            |                 |                 |        |
|               | Yeast Extract | 8572        | 10.857  | 2.476   | 254.004    | 15.598     | 139.533         | 11.005          |            |           |             |         |         |            |            |                 |                 |        |
|               | Yeast Extract | 9999        | 11.542  | 2.682   | 288.275    | 29.896     | 151.267         | 10.844          |            |           |             |         |         |            |            |                 |                 |        |
| Yeast Extract | 11426         | 12.35       | 2.864   | 307.393 | 34.974     | 164.733    | 8.693           |                 |            |           |             |         |         |            |            |                 |                 |        |
| Yeast Extract | 12853         | 12.676      | 3.073   | 323.78  | 38.118     | 171.267    | 8.157           |                 |            |           |             |         |         |            |            |                 |                 |        |
| Yeast Extract | 14280         | 13.338      | 3.182   | 328.283 | 34.614     | 179.667    | 8.122           |                 |            |           |             |         |         |            |            |                 |                 |        |

**Supplementary Table S3.** Comparison of rarefaction  $\alpha$  diversity measures in the initial well waters and upon completion of the various substrate incubation experiments including the no-substrate control using the following metrics: Phylogenetic Diversity (PD whole tree; a measure showing the branch length on a phylogenetic tree is covered by a given sample); Number of estimated species using the Chao1 estimator of species richness; and number of observed species-level OTUs (at the 97% level) in each community. Average values for each substrate and standard deviation are shown. A graphical presentation for the rarefaction curves of initial well waters vs. treatments using the phylogenetic diversity metrics is shown in Supplementary Fig. S2.



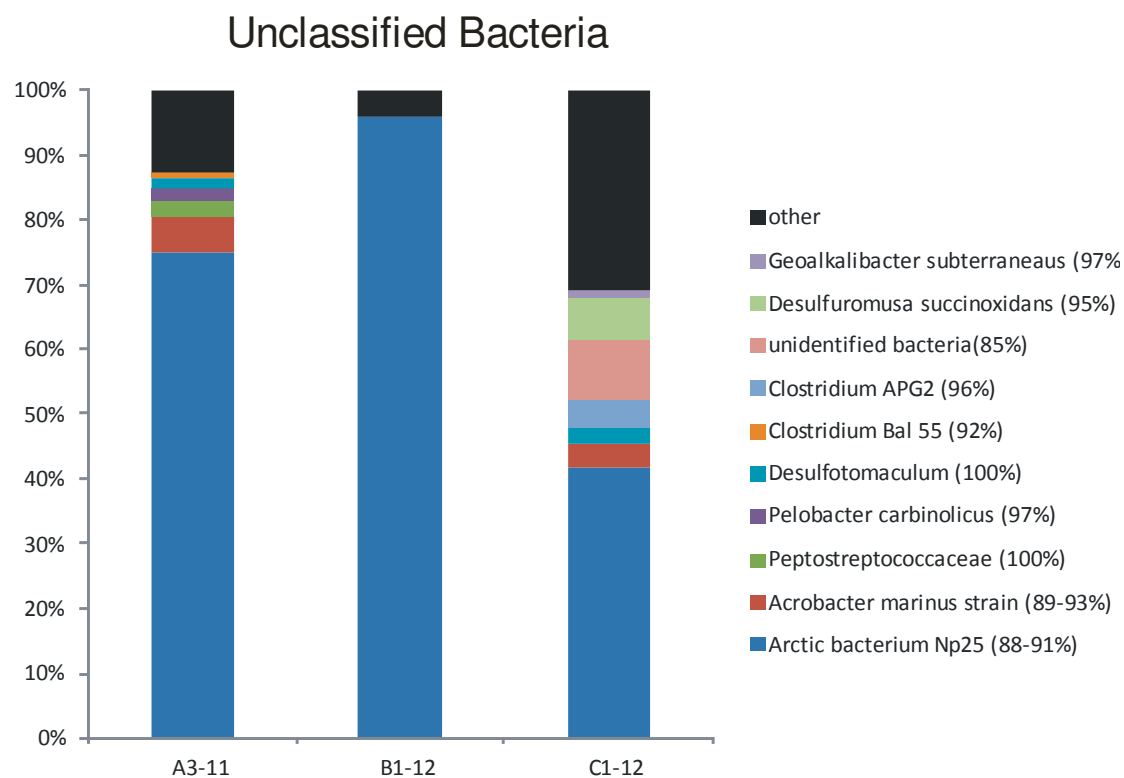

**Supplementary Fig. S3:** Most similar sequences from RDP to OTUs within the “unclassified bacteria group”, and which represented >1% of the total Illumina reads in the unclassified bacteria cluster. “Other” shows sum of OTUs which represent less than 1% of the total Illumina reads in the unclassified bacteria cluster.

**Supplementary Table S4.** Comparison between bacterial OTUs in well waters identified from capillary sequencing of DGGE bands and Illumina MiSeq analysis

| <b>Firmicutes:</b>           |                 |                                  |          |                                              |          |
|------------------------------|-----------------|----------------------------------|----------|----------------------------------------------|----------|
| NCBI                         |                 |                                  | identity |                                              | identity |
| accession nr                 | Illumina OTU ID | closest culture NCBI hit         | %        | closest environmental NCBI hit               | %        |
| KF728891                     | 1742            | Halanaerobium hydrogeniformans   | 99       | this study DGGE_OTU1_1                       | 99       |
| KF728892                     | 437             | Halanaerobium congolense         | 100      | this study DGGE_OTU1_2                       | 100      |
| KF728893                     | 265             | Orenia salinaria                 | 90       | this study DGGE_OTU14                        | 99       |
| KF728894                     | 615             | Orenia marismotui                | 94       | this study DGGE_OTU13                        | 100      |
| KF728895                     | 1072            | Halocella cellulosilytica        | 96       | this study DGGE_OTU2                         | 99       |
| <b>Bacteroidetes</b>         |                 |                                  |          |                                              |          |
| KF728896                     | 1443            | Cytophaga sp. AN-B14             | 100      | this study DGGE_OTU35                        | 100      |
| KF728897                     | 1364            | Marinilabilia salmonicolor       | 100      | this study DGGE_OTU34                        | 100      |
| KF728898                     | 138             | Prolixibacter bellariivorans     | 95       | this study DGGE_OTU37                        | 100      |
| KF728899                     | 975             | Bacteroidetes bacterium G13a-B   | 100      | this study DGGE_OTU38                        | 100      |
| KF728900                     | 805             | Bacterium Phenol-4               | 98       | uncultured bacterium                         | 100      |
| KF728901                     | 667             | Bacteroides graminisolvans       | 100      | uncultured bacterium                         | 100      |
| <b>Proteobacteria</b>        |                 |                                  |          |                                              |          |
| KF728902                     | 148             | Arcobacter marinus               | 100      | this study DGGE_OTU25                        | 100      |
| KF728903                     | 1339            | Sulfurospirillum carboxydovorans | 99       | this study DGGE_OTU27                        | 99       |
| KF728904                     | 1363            | Pelobacter carbinolicus          | 100      | this study DGGE_OTU18/20                     | 100      |
| KF728905                     | 665             | Desulfovibrio sp. AND1           | 99       | this study DGGE_OTU16                        | 99       |
| KF728906                     | 99              | Geobacter hephaestius            | 98       | Uncultured Geobacter                         | 99       |
| KF728907                     | 1407            | Sulfurospirillum halorespirans   | 92       | this study DGGE_OTU26                        | 99       |
| KF728908                     | 135             | Geothermobacter sp. HR-1         | 98       | Uncultured Geobacter                         | 98       |
| KF728909                     | 1362            | Desulfuromusa                    | 98       | this study DGGE_OTU20                        | 100      |
| KF728910                     | 323             | Geoalkalibacter subterraneus     | 100      | this study DGGE_OTU21                        | 100      |
| KF728911                     | 464             | Desulfovibrio aespoensis Aspo-2  | 100      | this study DGGE_OTU15                        | 100      |
| <b>unclassified Bacteria</b> |                 |                                  |          |                                              |          |
| KF728912                     | 772             | Arctic bacterium NP25            | 91       | this study DGGE_OTU28                        | 100      |
| KF728913                     | 388             | Acrobacter marinus               | 93       | this study DGGE_OTU25                        | 93       |
| KF728914                     | 67              | Peptostreptococcaceae Col 18     | 99       | this study DGGE_OTU 9                        | 99       |
| KF728915                     | 590             | Pelobacter carbinolicus          | 97       | this study DGGE_OTU 18                       | 97       |
| KF728916                     | 66              | Desulfotomaculum halophilum      | 100      | Desulfotomaculum halophilum                  | 100      |
| KF728917                     | 452             | Clostridium Bal 55               | 92       | this study DGGE_OTU11                        | 99       |
| KF728918                     | 1243            | Acrobacter marinus               | 89       | this study DGGE_OTU25                        | 89       |
| KF728922                     | 1123            | unidentified bacteria from soil  | 85       | GB vent bacterium                            | 96       |
| KF728919                     | 840             | Desulfuromusa succinioxidans     | 95       | this study DGGE_OTU 20                       | 97       |
| KF728920                     | 446             | Clostridium APG2                 | 96       | this study DGGE_OTU 8                        | 100      |
| KF728921                     | 310             | Geoalkalibacter subterraneus     | 97       | this study DGGE_OTU21                        | 97       |
| <b>Archaea</b>               |                 |                                  |          |                                              |          |
| KF728923                     | 430             | Methanohalophilus halophilus     | 99       | this study DGGE OTU_M1                       | 100      |
| KF728924                     | 869             | Methanobolus profundus           | 99       | this study DGGE OTU_M1_9                     | 100      |
| KF728925                     | 124             | Methanoplanus limicola           | 99       | Uncultured archaeon clone MIARCBf08          | 99       |
| KF728925                     | 124             | Methanoplanus limicola           | 99       | this study DGGE OTU_M2                       | 94       |
| KF728926                     | 481             | Methanocaldococcus halotolerans  | 98       | this study DGGE OTU_M3                       | 98       |
| KF728927                     | 84              | Euryarchaeote D4.75-18           | 90       | Uncultured euryarchaeote clone ANT144-BP     | 97       |
| KF728927                     | 84              | Euryarchaeote D4.75-18           | 90       | this study DGGE OTU_M1_9                     | 96       |
| KF728928                     | 1797            | Euryarchaeote D4.75-18           | 88       | Uncultured archaeon clone O127706F11 (2)     | 94       |
| KF728929                     | 1456            | Euryarchaeote D4.75-18           | 91       | Uncultured euryarchaeote clone GN27N3B (3)   | 94       |
| KF728930                     | 1434            | Euryarchaeote D4.75-18           | 87       | Uncultured archaeon DGGE gel band 15 (5)     | 94       |
| KF728931                     | 1608            | Euryarchaeote D4.75-18           | 88       | Uncultured euryarchaeote clone ANT106-CF (7) | 99       |
| KF728932                     | 1839            | Euryarchaeote D4.75-18           | 87       | Uncultured euryarchaeote clone TD01 (8)      | 92       |
| KF728933                     | 1574            | Euryarchaeote D4.75-18           | 90       | Uncultured archaeal clone ANNA-A8 (11)       | 94       |
| KF728934                     | 872             | Archaeoglobus infectus           | 90       | Uncultured archaeon clone MIARCBf08 (1)      | 98       |
| KF728935                     | 1429            | Archaeoglobus infectus           | 90       | Uncultured archaeon clone MIARCBf08 (1)      | 100      |
| KF728936                     | 475             | Archaeoglobus infectus           | 90       | Uncultured archaeon clone MIARCBf08 (1)      | 97       |
| KF728937                     | 417             | Euryarchaeote J3.25-8            | 91       | Uncultured archaeon clone CP-A123            | 99       |
| KF728937                     | 417             | Euryarchaeote J3.25-8            | 91       | this study DGGE OTU_O5                       | 97       |
| KF728938                     | 1829            | no close match                   |          | this study OTU_D1_9                          | 98       |

|          |      |                |                                                |    |
|----------|------|----------------|------------------------------------------------|----|
| KF728939 | 919  | no close match | this study OTU_D1_9                            | 96 |
| KF728940 | 831  | no close match | this study OUT_D1_9                            | 94 |
| KF728941 | 130  | no close match | Uncultured euryarchaeote clone ANT144-BP       | 97 |
| KF728941 | 130  | no close match | this study DGGE OTU_M1_9                       | 97 |
| KF728942 | 976  | no close match | Uncultured archaeon clone KSTwh-C1-1-A-033 (6) | 96 |
| KF728943 | 855  | no close match | Uncultured archaeon OUT_4a (10)                | 83 |
| KF728944 | 586  | no close match | Uncultured euryarchaeote clone GN25D01A (9)    | 92 |
| KF728945 | 1563 | no close match | Uncultured archaeon clone KSTwh-C1-1-A-033 (6) | 92 |
| KF728946 | 578  | no close match | Uncultured euryarchaeote clone GN28DB56 (4)    | 89 |

**Supplementary Table S5:** All Bacterial (A) and Archaeal (B) OTUs with accession numbers recovered with the DGGE approach in the initial formation water and incubation experiments. OTUs marked with \* were only found in yeast extract and TMA incubation experiments but not in the initial well water. Maximal identities to closest cultured relatives from NCBI with their accession number are shown.

| This study<br>OTUnr | This study NCBI<br>Accession nr | Max ident | closest cultured relative NCBI<br>Description        | closest cultured relative NCBI<br>Accession nr |
|---------------------|---------------------------------|-----------|------------------------------------------------------|------------------------------------------------|
| Bacteria:           |                                 |           |                                                      |                                                |
| 1_1                 | KC262274                        | 100%      | <i>Halanaerobium hydrogeniformans</i>                | CP002304                                       |
| 1_2                 | KC262275                        | 99%       | <i>Halanaerobium congolense</i> strain SEBR 4224     | NR_026044                                      |
| 2                   | KC262276                        | 93%       | <i>Halocella cellulolsilytica</i>                    | NR_036959                                      |
| 3                   | KC262277                        | 96%       | <i>Sporosalibacterium faouarense</i>                 | EU567322                                       |
| 4                   | KC262278                        | 98%       | <i>Sporosalibacterium faouarense</i>                 | EU567322                                       |
| 5                   | KC262279                        | 96%       | <i>Clostridium caminithermale</i> strain DVird3      | NR_041887                                      |
| 6                   | KC262280                        | 99%       | <i>Clostridium</i> sp. AN-AS3B                       | FR872929                                       |
| 7*                  | KC262281                        | 96%       | <i>Alkaliphilus peptidofragmentans</i> strain Z-7036 | EF382660                                       |
| 8                   | KC262282                        | 95%       | <i>Clostridium</i> sp. AN-AS6C                       | FR872932                                       |
| 9                   | KC262283                        | 100%      | Peptostreptococcaceae bacterium Col 18               | GU194175                                       |
| 10                  | KC262284                        | 97%       | <i>Clostridium caminithermale</i> strain DVird3      | NR_041887                                      |
| 11                  | KC262285                        | 92%       | Clostridiales bacterium Bal55                        | AB260037                                       |
| 12                  | KC262286                        | 93%       | Clostridiales bacterium Bal55                        | AB260037                                       |
| 13                  | KC262287                        | 92%       | <i>Orenia marismortui</i> strain DSM 5156            | NR_026259                                      |
| 14                  | KC262288                        | 94%       | <i>Orenia marismortui</i> strain DSM 5156            | NR_026259                                      |
| 15                  | KC262289                        | 99%       | <i>Desulfovibrio aespoeensis</i> Aspo-2              | CP00243                                        |
| 16                  | KC262290                        | 100%      | <i>Desulfovibrio</i> sp. AND1                        | AY281344                                       |
| 17                  | KC262291                        | 99%       | <i>Desulfovibrio longus</i> strain SEBR 2582         | NR_025765                                      |
| 18                  | KC262292                        | 99%       | <i>Pelobacter venetianus</i>                         | NR_044779                                      |
| 20                  | KC262293                        | 92%       | <i>Pelobacter carbinolicus</i>                       | U23141                                         |
| 21                  | KC262294                        | 99%       | <i>Geothrix subterranea</i> strain Red1              | NR_044429                                      |
| 22                  | KC262295                        | 100%      | e.g. <i>Pseudomonas salomonii</i> strain +Y14        | JX134631                                       |
| 23                  | KC262296                        | 100%      | e.g. <i>Pseudomonas</i> sp. A15 (2012)               | JQ522968                                       |
| 25                  | KC262298                        | 100%      | <i>Arcobacter marinus</i> strain CL-S1               | EU512920                                       |
| 26                  | KC262299                        | 93%       | <i>Sulfurospirillum</i> sp. 18.1                     | AF357199                                       |
| 27                  | KC262300                        | 99%       | <i>Geospirillum</i> sp. SM-5                         | U85965                                         |
| 27                  | KC262300                        | 99%       | <i>Sulfurospirillum carboxydovorans</i> strain MV    | AY740528                                       |
| 28                  | KC262301                        | 96%       | Arctic bacterium NP25                                | EU196331                                       |
| 29                  | KC262302                        | 96%       | Arctic bacterium NP25                                | EU196331                                       |
| 30                  | KC262303                        | 100%      | <i>Alcaligenes</i> sp. ES-JQ-2                       | FJ529027                                       |
| 31                  | KC262304                        | 97%       | <i>Dechloromonas UWNr4</i>                           | FJ477303                                       |
| 32*                 | KC262305                        | 100%      | <i>Dethiosulfobrevibacter acidaminovorans</i>        | NR_029034                                      |
| 32*                 | KC262305                        | 100%      | <i>Dethiosulfobrevibacter russensis</i>              | NR_041793                                      |
| 32*                 | KC262305                        | 100%      | <i>Dethiosulfobrevibacter marinus</i>                | NR_025081                                      |
| 33                  | KC262306                        | 89%       | <i>Aminobacterium colombiense</i> DSM 12261          | CP001997                                       |
| 34                  | KC262307                        | 99%       | <i>Marinilabilia salmonicolor</i>                    | GU198996                                       |
| 35                  | KC262308                        | 98%       | <i>Cytophaga</i> sp. AN-BI4                          | AM157648                                       |
| 36                  | KC262309                        | 99%       | <i>Prolixibacter bellariivorans</i> strain F2        | NR_043273                                      |
| 37                  | KC262310                        | 96%       | <i>Prolixibacter bellariivorans</i> strain F2        | NR_043273                                      |
| 38                  | KC262311                        | 98%       | Bacteroidetes bacterium G13a-B                       | FN397996                                       |
| 40                  | KC262312                        | 100%      | <i>Propionibacterium</i> sp. S4-S6                   | JX104050                                       |
| 41                  | KC262313                        | 100%      | <i>Corynebacterium</i> sp. VTT E-073034              | EU438939                                       |
| 42                  | KC262314                        | 94%       | <i>Alkalibaculum bacchi</i> strain CP11              | FJ438469                                       |

(A)

| This study<br>OTUnr                 | This study NCBI<br>Accession nr | Max ident | closest cultured relative NCBI<br>Description | closest cultured relative NCBI<br>Accession nr |
|-------------------------------------|---------------------------------|-----------|-----------------------------------------------|------------------------------------------------|
| Archaea:                            |                                 |           |                                               |                                                |
| M1_59                               | KC262315                        | 99-100%   | <i>Methanobolus / Methanohalophilus</i>       | NR_041665/JQ346755                             |
| M1_9                                | KC262316                        | 99-100%   | <i>Methanobolus / Methanohalophilus</i>       | NR_041665/JQ346756                             |
| M1_45                               | KC262317                        | 99-100%   | <i>Methanobolus / Methanohalophilus</i>       | NR_041665/JQ346757                             |
| M1_0426a003                         | KC262318                        | 99-100%   | <i>Methanobolus / Methanohalophilus</i>       | NR_041665/JQ346758                             |
| M1_0426a002                         | KC262319                        | 99-100%   | <i>Methanobolus / Methanohalophilus</i>       | NR_041665/JQ346759                             |
| M1_0426a063                         | KC262320                        | 99-100%   | <i>Methanobolus / Methanohalophilus</i>       | NR_041665/JQ346760                             |
| M1_0425a007                         | KC262321                        | 99-100%   | <i>Methanobolus / Methanohalophilus</i>       | NR_041665/JQ346761                             |
| M1_0330a064                         | KC262322                        | 99-100%   | <i>Methanobolus / Methanohalophilus</i>       | NR_041665/JQ346762                             |
| M1_0406a002                         | KC262323                        | 99-100%   | <i>Methanobolus / Methanohalophilus</i>       | NR_041665/JQ346763                             |
| M1_0406a010                         | KC262324                        | 99-100%   | <i>Methanobolus / Methanohalophilus</i>       | NR_041665/JQ346764                             |
| M1_0406a056                         | KC262325                        | 99-100%   | <i>Methanobolus / Methanohalophilus</i>       | NR_041665/JQ346765                             |
| M2_0406a013                         | KC262326                        | 99%       | <i>Methanoplanus limicola</i>                 | AB546259                                       |
| M3_0427a021                         | KC262327                        | 100%      | <i>Methanocalculus halotolerans</i>           | NR_024870                                      |
| M3_0427a017                         | KC262328                        | 100%      | <i>Methanocalculus halotolerans</i>           | NR_024870                                      |
| closest environmental sequence NCBI |                                 |           |                                               |                                                |
| D1_9 +                              | KC262329                        | 94%       | uncultured archaeon clone 1572_93arch         | JF500394                                       |
| D1_1201a019 +                       | KC262330                        | 96%       | uncultured euryarchaeote clone ANT-144BP      | GU969471                                       |
| O1_5 +                              | KC262331                        | 86%       | uncultured archaeon clone SS030               | EU329767                                       |
| O2_5 +                              | KC262332                        | 84%       | uncultured archaeon clone SS030               | EU329767                                       |
| O3_2 +                              | KC262333                        | 96%       | uncultured archaeon clone CP-A 127            | DQ521194                                       |
| O4_1128a090 +                       | KC262334                        | 83%       | uncultured archaeon clone ss036a              | AJ969774                                       |
| O5_3                                | KC262335                        | 95%       | uncultured archaeon clone GH-A 55             | DG521145                                       |

**(B)**

Archaeal OTUs marked with + were only found in the initial well water but not in the incubation experiments.

**Supplementary Fig. S4 (next page):** Maximum likelihood tree of euryarchaeal 16S rRNA genes built using RAXML on 1323 aligned positions, showing the phylogenetic relationship between DGGE fragments detected in this study and major euryarchaeal groups. Accession numbers are shown for all sequences obtained from Genbank. Nodes are labeled with the percentage of bootstrap variations (out of 100) that contained that node. Unlabeled nodes denote positions at which short or low-quality sequences were added to the tree using ARB's parsimony quick-add functionality, and the species are shown in bold. The number of species included in collapsed groups is shown to the right of their position. Sequences marked with an \* represent previously described OTUs from the Antrim Shale environment (Waldron *et al.*, 2007). Sequences from this study are color coded in grey.



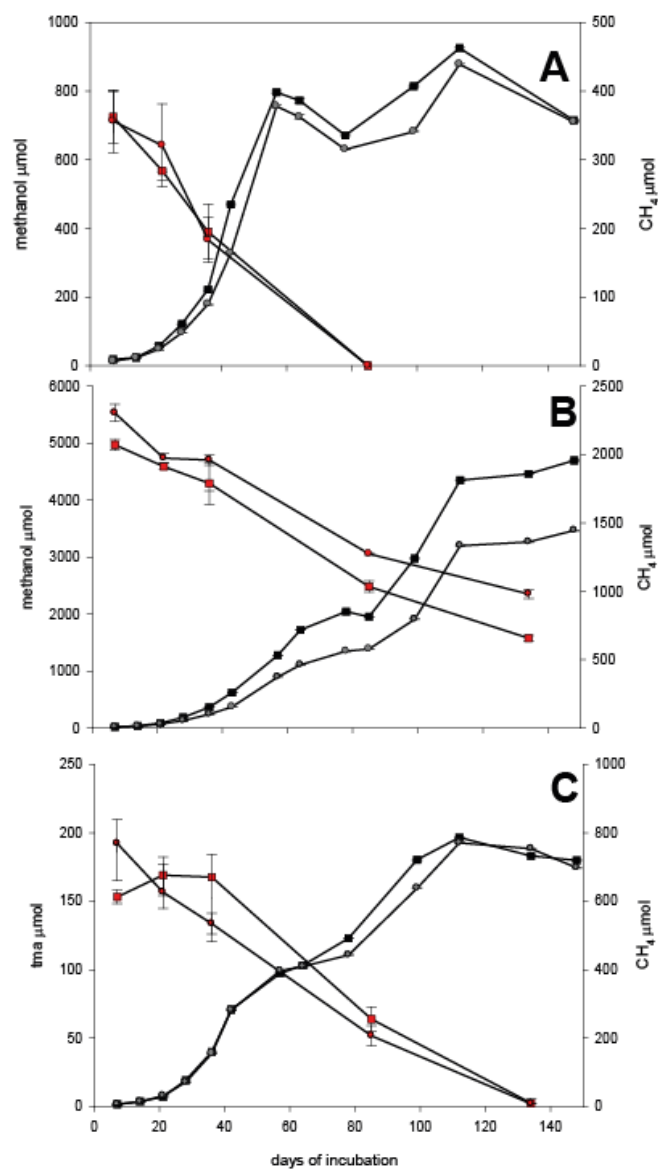

**Supplementary Fig. S5:** Methanol and TMA consumption, and methane accumulation in the A3-11 well over the course of the experiment. (A) no substrate (B) methanol addition (C) TMA addition.

Methane yields: ■ incubation bottle 1, ● incubation bottle 2.

Methanol and TMA amounts: ■ incubation bottle 1, ● incubation bottle 2.

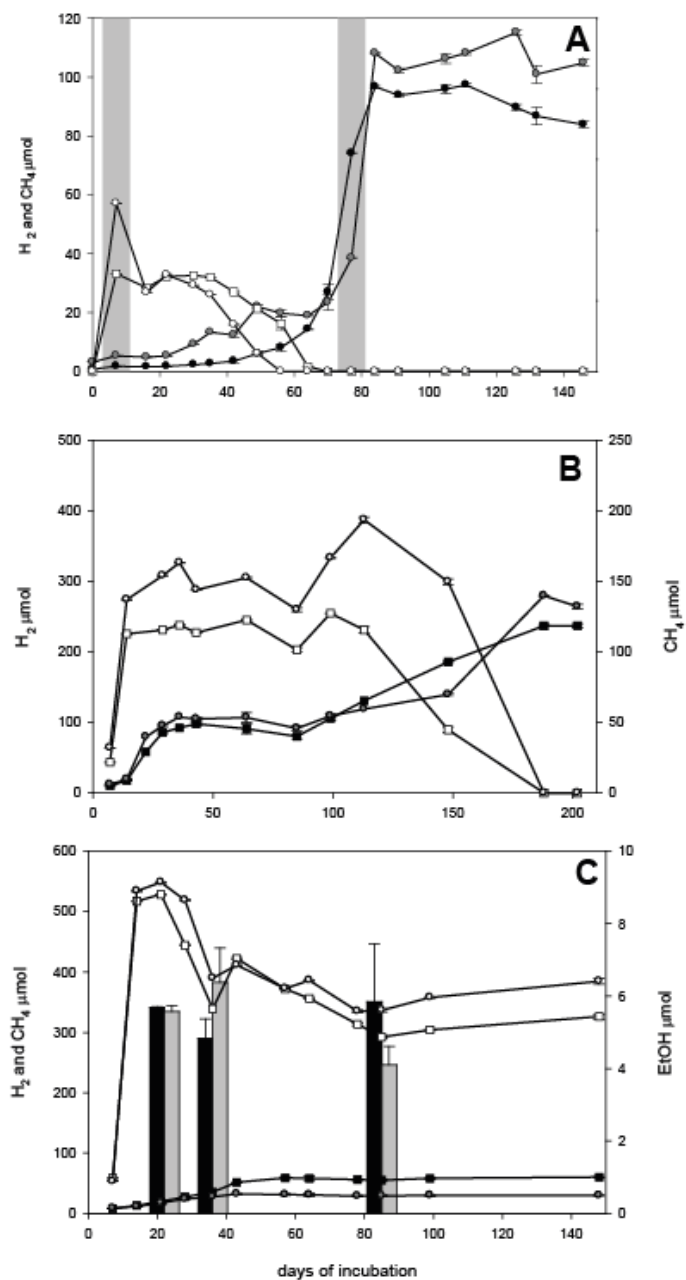

**Supplementary Fig. S6:** Hydrogen and methane accumulation in different treatments: (A) yeast extract C1-12 well, shaded gray area marks sampling for amino acid analyses, (B) formate B1-12 well and (C) glucose A3-11 well.

Methane accumulation: ■ incubation bottle 1, ● incubation bottle 2,

Hydrogen accumulation: □ incubation bottle 1, ○ incubation bottle 2,

Ethanol amounts: ■ incubation bottle 1, ■ incubation bottle 2.



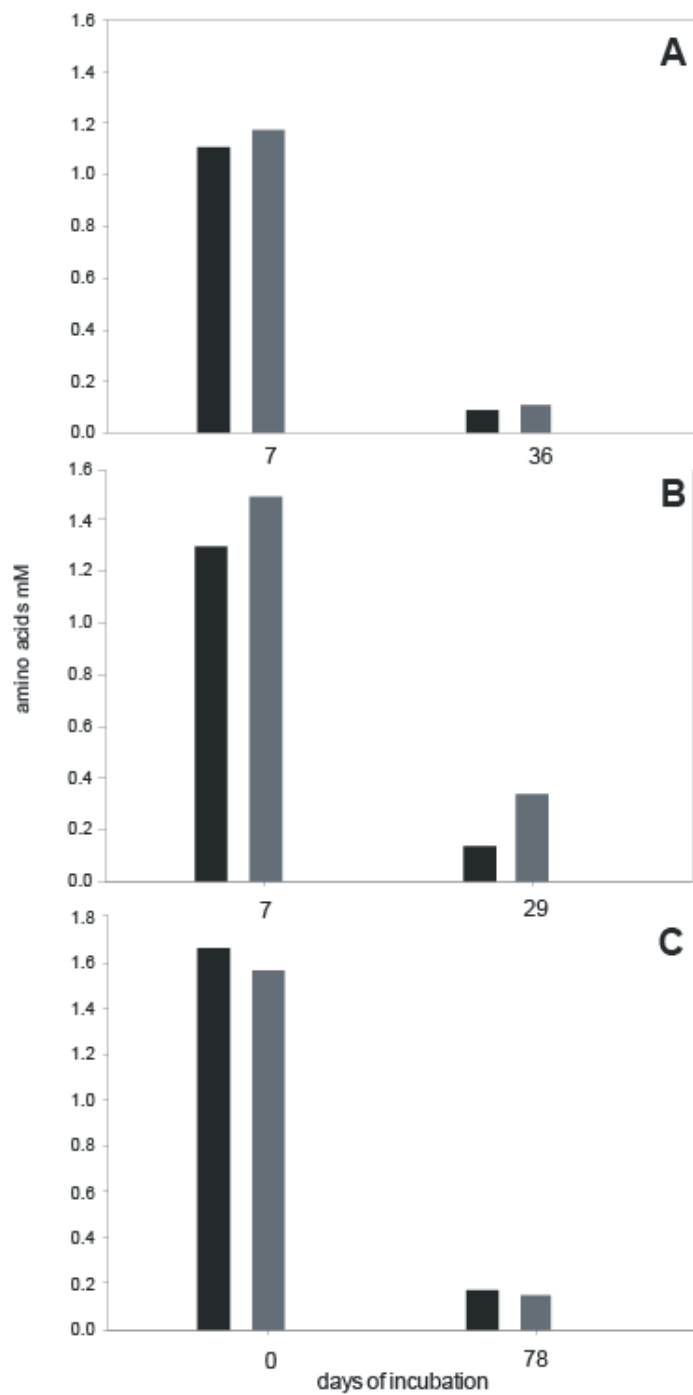

**Supplementary Fig. S7:** Amino acid consumption in the yeast extract incubation. **A:** A3-11 well, **B:** B1-12 well, **C:** C1-12 well. Black: bottle 1, dark grey: bottle 2.

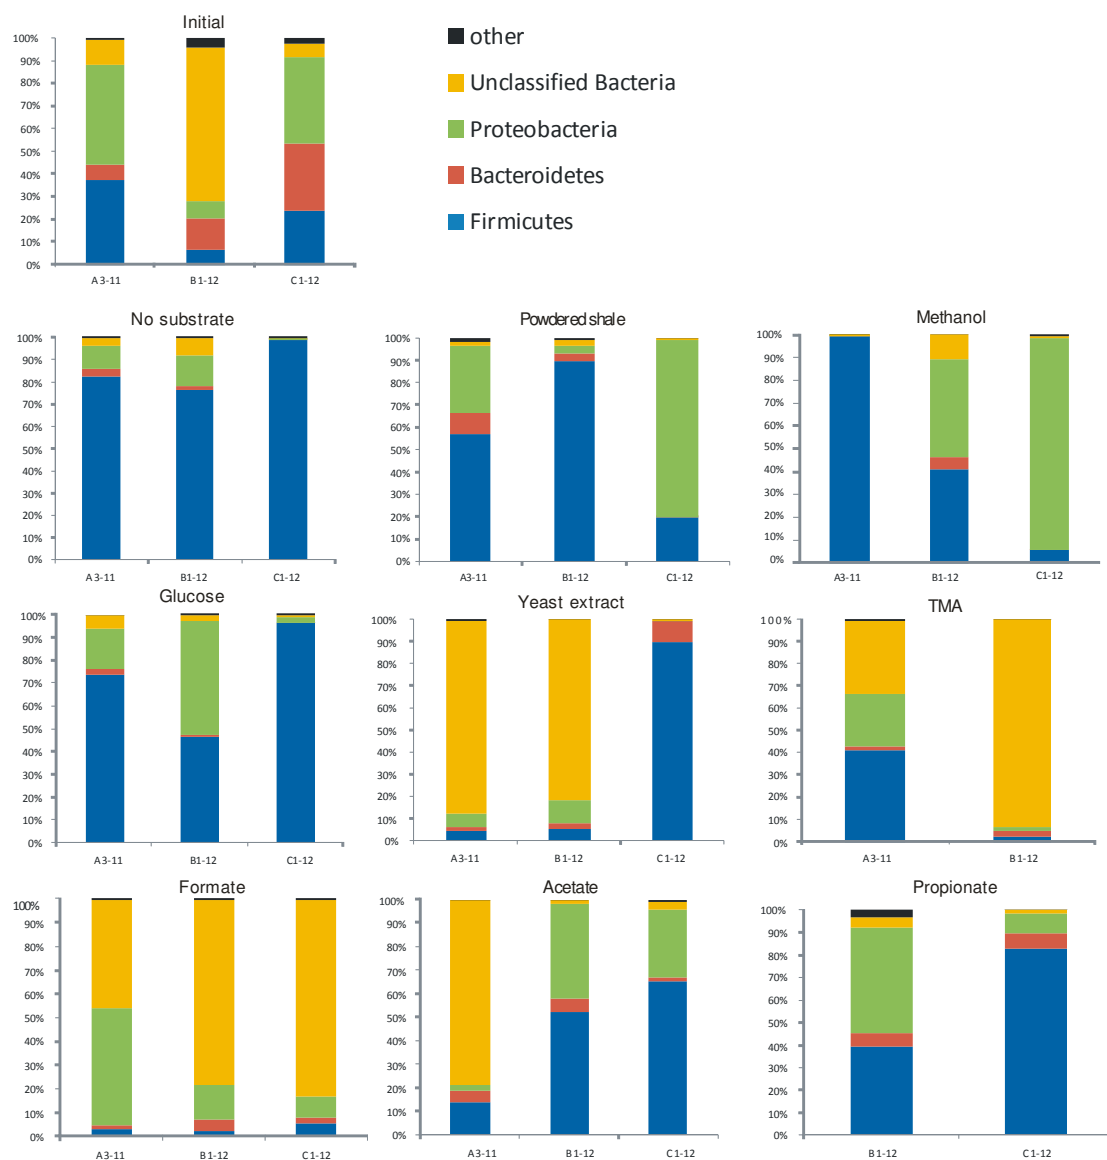

**Supplementary Fig. S8:** Detailed information of the prokaryotic community composition in the different incubation experiments. Equal amounts of PCR products from the duplicate bottles were pooled for subsequent Illumina sequencing.

Bacterial reads represent >97% of the total Illumina reads. The dominant OTUs in the different phyla were closest related to cultures from:

- Firmicutes: *Halanerobium hydrogeniformans*, *-congolense* and *Orenia marismortui*, *-salinaria*,
- Bacteroidetes: *Marinilabilia salmonicolor*, *Prolixibacter bellariivorans*.
- Proteobacteria: *Acrobacter marinus*, *Pelobacter carbinolicus*, *Sulfurospirillum* sp. and *Desulfovibrio* sp.
- Unclassified bacteria: Arctic bacterium NP25

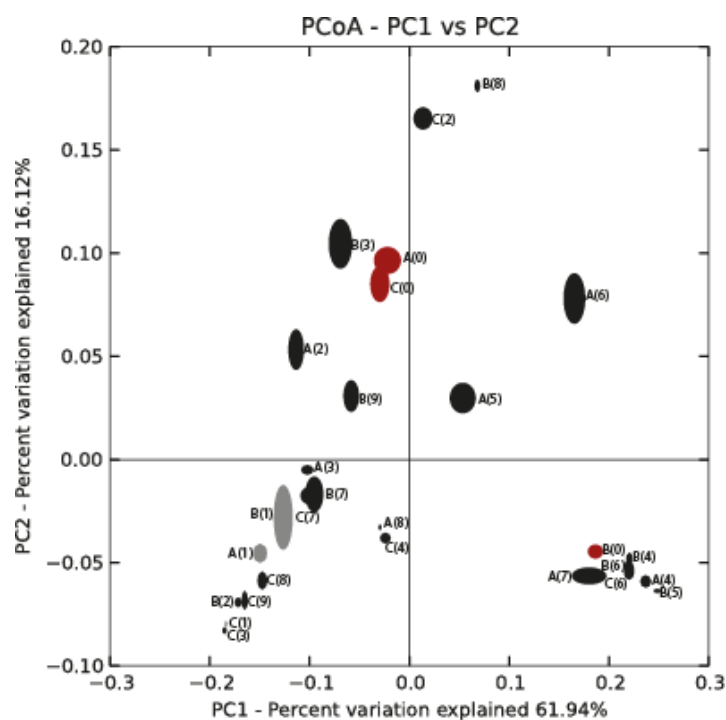

**Supplementary Fig. S9.** Jackknifed PCoA plot of initial well water samples and after incubation with the various methanogenic and fermentative substrates with weighted Unifrac. Shown is a plot of the first two principal coordinate axes, which combined explain 78% of the variation. Ellipses represent the interquartile range of the distribution of points among the ten jackknifed replicates. A (A3-11), B (B1-12), C (1-12), 0 (red: initial well water), 1 (grey: no substrate incubation control), 2 (shale), 3 (glucose), 4 (yeast extract), 5 (TMA), 6 (formate), 7 (acetate), 8 (methanol), 9 (propionate).

## References

- Altschul SF, Gish W, Miller W, Myers EW & Lipman DJ (1990) Basic Local Alignment Search Tool. *Journal of Molecular Biology* **215**: 403-410.
- Coolen MJL, Saenz JP, Giosan L, Trowbridge NY, Dimitrov P, Dimitrov D & Eglinton TI (2009) DNA and lipid molecular stratigraphic records of haptophyte succession in the Black Sea during the Holocene. *Earth and Planetary Science Letters* **284**: 610-621.
- DeLong EF (1992) Archaea in coastal marine environments. *Proceedings of the National Academy of Sciences of the United States of America* **89**: 5685-5689.
- Ludwig W, Strunk O, Westram R, *et al.* (2004) ARB: a software environment for sequence data. *Nucleic Acids Research* **32**: 1363-1371.
- Muyzer G, De Waal EC & Uitterlinden AG (1993) Profiling of complex microbial populations by denaturing gradient gel electrophoresis analysis of polymerase chain reaction-amplified genes coding for 16S rRNA. *Applied and Environmental Microbiology* **59**: 695-700.
- Ovreas L, Forney L, Daae FL & Torsvik V (1997) Distribution of bacterioplankton in meromictic Lake Saelenvannet, as determined by denaturing gradient gel electrophoresis of PCR-amplified gene fragments coding for 16S rRNA. *Applied and Environmental Microbiology* **63**: 3367-3373.
- Pruesse E, Quast C, Knittel K, Fuchs BM, Ludwig WG, Peplies J & Glockner FO (2007) SILVA: a comprehensive online resource for quality checked and aligned ribosomal RNA sequence data compatible with ARB. *Nucleic Acids Research* **35**: 7188-7196.
- Schloss PD, Westcott SL, Ryabin T, *et al.* (2009) Introducing mothur: Open-Source, Platform-Independent, Community-Supported Software for Describing and Comparing Microbial Communities. *Applied and Environmental Microbiology* **75**: 7537-7541.
- Stahl DA & Amann R (1991) Development and application of nucleic acid probes in bacterial systematics. *Nucleic acid techniques in bacterial systematics*, (Stackebrandt E & Goodfellow M, ed.^eds.), p.^pp. 205-248. Wiley, Chichester.
- Takai K & Horikoshi K (2000) Rapid detection and quantification of members of the archaeal community by quantitative PCR using fluorogenic probes. *Applied and Environmental Microbiology* **66**: 5066-+.
- Waldron PJ, Petsch ST, Martini AM & Nüsslein K (2007) Salinity constraints on subsurface archaeal diversity and methanogenesis in sedimentary rock rich in organic matter. *Applied and Environmental Microbiology* **73**: 4171-4179.
- Wuchter C, Schouten S, Coolen MJL & Sinninghe Damste, JS (2004) Temperature-dependent variation in the distribution of tetraether membrane lipids of marine Crenarchaeota: Implications for TEX 86 paleothermometry. *Paleoceanography* **19**: PA4028, doi:4010.1029/2004PA001041, 002004-.
